# Supplementary material for: Pliocene shorelines and the epeirogenic motion of continental margins: A target dataset for dynamic topography models
Source: Copernicus journal article supplement (doi:10.5194/egusphere-2023-2099), 2024-02-23
Supplement: Supplementary file 1 [file egusphere-2023-2099-supplement.zip]

### **Supplementary Figure captions**

**Supplementary Figure 1:** Compilation of scarp elevation data. See README for parameter details on the report DT simulations.

**Supplementary Figure 2:** Comparison of GIA-corrected scarp elevations with full DT suite ( $n = 135$ ). (a) Darling (Australia); (b) Roe Plain (Australia); (c) Kongo Central (DRC); (d) Benghazi (Libya); (e) Mahafaly (Madagascar); (f) Al Wusta (Oman); (g) De Hoop (South Africa); (h) Socotra (Yemen); (i) Nome (Alaska, USA); (j) East Coast (USA); (k) map inset showing site locations.
