# Supplementary material for: Pliocene shorelines and the epeirogenic motion of continental margins: A target dataset for dynamic topography models
Source: Copernicus journal article supplement (doi:10.5194/egusphere-2023-2099), 2024-02-23
Supplement: Supplementary file 1 [file sfig1.xlsx]

## Sheet: Darling (Australia)
Latitude	Longitude	Distance (km)	Inner margin elevation (m)	Elevation error (m)	Upper of IR	Lower limit of IR	RWL (m)	IR (m)	Paleo RSL (m)	Paleo RSL uncertainty (m)	Mean GIA correction (m)	1σ of mean GIA correction (m)	GIA-corrected elevation (m)	GIA-corrected elevation uncertainty (m)	Data source	Profile extraction method	r75a	r75b	r85b
-30.2466	115.165	6.34623	74.7698	10.8222	3	-3	0	6	74.7698	11.2303	-0.720849	1.97868	75.4907	11.4033	This study	SRTM 1-arcsecond, TerraceM	28.9614	32.7391	29.5459
-30.4016	115.231	24.375	85.0978	13.609	3	-3	0	6	85.0978	13.9357	-0.716396	1.98041	85.8142	14.0757	This study	SRTM 1-arcsecond, TerraceM	30.088	33.9928	29.8649
-30.5017	115.307	37.8731	69.2576	5.73607	3	-3	0	6	69.2576	6.47321	-0.733152	1.98883	69.9908	6.77185	This study	SRTM 1-arcsecond, TerraceM	30.1509	34.0925	30.2586
-30.5898	115.392	50.9639	83.6537	4.75467	3	-3	0	6	83.6537	5.622	-0.75825	2.00046	84.4119	5.96731	This study	SRTM 1-arcsecond, TerraceM	29.6603	33.7069	30.5598
-30.7079	115.474	66.9135	105.039	5.46883	3	-3	0	6	105.039	6.23763	-0.774356	2.01071	105.814	6.5537	This study	SRTM 1-arcsecond, TerraceM	29.6885	33.9486	31.2151
-30.8193	115.566	82.3182	99.506	3.97195	3	-3	0	6	99.506	4.97759	-0.797783	2.02421	100.304	5.37343	This study	SRTM 1-arcsecond, TerraceM	29.5627	34.1281	31.9642
-30.9278	115.651	97.0468	95.9054	7.0288	3	-3	0	6	95.9054	7.64226	-0.818704	2.0375	96.7242	7.9092	This study	SRTM 1-arcsecond, TerraceM	29.729	34.5905	33.0354
-31.5016	115.97	167.254	71.3546	3.94573	3	-3	0	6	71.3546	4.95669	-0.830744	2.10036	72.1853	5.38333	This study	SRTM 1-arcsecond, TerraceM	32.9549	38.2126	39.9837
-31.9757	116.022	220.14	41.129	7.96961	3	-3	0	6	41.129	8.51556	-0.712357	2.1049	41.8413	8.77185	This study	SRTM 1-arcsecond, TerraceM	38.2961	43.6521	46.5633
-32.1735	116.014	241.331	36.5056	6.23081	3	-3	0	6	36.5056	6.91542	-0.623393	2.10306	37.129	7.22813	This study	SRTM 1-arcsecond, TerraceM	40.5797	46.036	48.547
-32.3905	115.998	264.767	40.1519	9.92727	3	-3	0	6	40.1519	10.3707	-0.517821	2.1007	40.6697	10.5813	This study	SRTM 1-arcsecond, TerraceM	42.3037	48.217	49.4365
-32.5577	115.97	283.002	40.8122	5.34405	3	-3	0	6	40.8122	6.12853	-0.425704	2.09516	41.2379	6.47677	This study	SRTM 1-arcsecond, TerraceM	43.3786	49.6373	49.0584
-32.6479	115.957	292.744	35.181	4.42087	3	-3	0	6	35.181	5.34267	-0.376728	2.09271	35.5577	5.7379	This study	SRTM 1-arcsecond, TerraceM	43.5651	50.0199	48.2761
-33.0212	115.912	333.304	30.0304	5.29759	3	-3	0	6	30.0304	6.08806	-0.178532	2.08311	30.2089	6.43458	This study	SRTM 1-arcsecond, TerraceM	43.4723	50.1741	44.2715
-33.456	115.765	382.558	44.3983	5.85384	3	-3	0	6	44.3983	6.5778	0.157314	2.00146	44.241	6.87556	This study	SRTM 1-arcsecond, TerraceM	40.0042	46.3386	33.8244
-33.64	115.619	407.872	36.3964	2.96787	3	-3	0	6	36.3964	4.21998	0.34996	1.96115	36.0464	4.65342	This study	SRTM 1-arcsecond, TerraceM	37.8812	43.9852	27.3438
-33.7285	115.495	424.19	36.188	4.22242	3	-3	0	6	36.188	5.17965	0.47587	1.93785	35.7121	5.53029	This study	SRTM 1-arcsecond, TerraceM	37.1541	42.9518	23.4092
-33.763	115.422	432.808	40.8893	6.58357	3	-3	0	6	40.8893	7.23488	0.539874	1.92688	40.3495	7.48708	This study	SRTM 1-arcsecond, TerraceM	37.1381	42.7524	21.5734
-33.7836	115.347	441.088	40.8837	4.48356	3	-3	0	6	40.8837	5.39466	0.597255	1.91752	40.2865	5.72532	This study	SRTM 1-arcsecond, TerraceM	37.4804	42.8968	20.0988
-33.7817	115.25	451.458	50.0599	6.86467	3	-3	0	6	50.0599	7.49158	0.656197	1.90833	49.4037	7.73081	This study	SRTM 1-arcsecond, TerraceM	38.8044	44.0853	19.2302
-33.7477	115.168	460.932	63.5126	8.40442	3	-3	0	6	63.5126	8.92381	0.688621	1.90322	62.824	9.1245	This study	SRTM 1-arcsecond, TerraceM	40.8226	46.0367	19.4989
-33.6877	115.123	468.916	33.0047	4.80644	3	-3	0	6	33.0047	5.66585	0.684135	1.90351	32.3206	5.97705	This study	SRTM 1-arcsecond, TerraceM	42.9915	48.1538	20.7724

## Sheet: Roe Plain (Australia)
Latitude	Longitude	Distance (km)	Inner margin elevation (m)	Elevation error (m)	Upper of IR	Lower limit of IR	RWL (m)	IR (m)	Paleo RSL (m)	Paleo RSL uncertainty (m)	Mean GIA correction (m)	1σ of mean GIA correction (m)	GIA-corrected elevation (m)	GIA-corrected elevation uncertainty (m)	Data source	Profile extraction method	r85	r85c	r87a	r114b
-32.0964	126.374	15.0793	8	3.2	0	-3	-1.5	3	9.5	3.53412	-2.28011	2.32201	11.7801	4.22868	This study	SRTM 1-arcsecond, TerraceM	40.9752	32.0267	34.707	6.2799
-32.0714	126.429	20.9373	13	3.2	0	-3	-1.5	3	14.5	3.53412	-2.30477	2.32433	16.8048	4.22995	This study	SRTM 1-arcsecond, TerraceM	39.7824	30.8515	33.5658	6.28015
-32.0635	126.446	22.6845	13	3.2	0	-3	-1.5	3	14.5	3.53412	-2.3125	2.3251	16.8125	4.23038	Rovere et al., 2014	SRTM 3-arcseconds, Surface profile	39.4219	30.496	33.2239	6.2718
-32.0489	126.496	27.856	15	3.2	0	-3	-1.5	3	16.5	3.53412	-2.32818	2.32629	18.8282	4.23103	This study	SRTM 3-arcseconds, Surface profile	38.5448	29.628	32.3604	6.37149
-32.0294	126.574	36.0102	18.1906	1.62891	0	-3	-1.5	3	19.6906	2.21435	-2.34978	2.32787	22.0404	3.21284	This study	SRTM 1-arcsecond, TerraceM	37.2831	28.3743	31.1093	6.56087
-32.0283	126.58	36.6366	17	3.2	0	-3	-1.5	3	18.5	3.53412	-2.35111	2.32794	20.8511	4.23194	Rovere et al., 2014	SRTM 3-arcseconds, Surface profile	37.1879	28.2783	31.0115	6.58787
-32.0337	126.651	43.7638	19.3303	1.26174	0	-3	-1.5	3	20.8303	1.9601	-2.35134	2.32647	23.1816	3.04211	This study	SRTM 1-arcsecond, TerraceM	36.5187	27.5916	30.2327	7.11842
-32.0339	126.699	48.6477	18	3.2	0	-3	-1.5	3	19.5	3.53412	-2.35446	2.32591	21.8545	4.23082	Rovere et al., 2014	SRTM 3-arcseconds, Surface profile	35.9761	27.0387	29.6313	7.43814
-32.0279	126.729	51.595	20.9177	1.59288	0	-3	-1.5	3	22.4177	2.18798	-2.36153	2.32637	24.7792	3.19363	This study	SRTM 1-arcsecond, TerraceM	35.5103	26.5708	29.1555	7.55746
-32.0202	126.797	58.2052	22	3.2	0	-3	-1.5	3	23.5	3.53412	-2.3726	2.32666	25.8726	4.23124	Rovere et al., 2014	SRTM 3-arcseconds, Surface profile	34.5931	25.6459	28.1881	7.90254
-32.0197	126.8	58.5235	23.5607	1.37035	0	-3	-1.5	3	25.0607	2.03172	-2.37324	2.3267	27.4339	3.08892	This study	SRTM 1-arcsecond, TerraceM	34.5502	25.6028	28.1438	7.91496
-31.9879	126.868	66.0717	24.6448	1.57922	0	-3	-1.5	3	26.1448	2.17806	-2.40218	2.33011	28.547	3.18957	This study	SRTM 1-arcsecond, TerraceM	33.1742	24.2416	26.811	7.94899
-31.9802	126.884	67.7537	28	3.2	0	-3	-1.5	3	29.5	3.53412	-2.40817	2.33089	31.9082	4.23356	Rovere et al., 2014	SRTM 3-arcseconds, Surface profile	32.8537	23.9255	26.5	7.95414
-31.9494	126.936	73.6008	31.2904	2.46218	0	-3	-1.5	3	32.7904	2.88311	-2.43123	2.33423	35.2216	3.70958	This study	SRTM 1-arcsecond, TerraceM	31.7165	22.8036	25.4122	7.8973
-31.9306	126.976	77.9636	29	3.2	0	-3	-1.5	3	30.5	3.53412	-2.44582	2.33632	32.9458	4.23655	Rovere et al., 2014	SRTM 3-arcseconds, Surface profile	30.9409	22.0304	24.6515	7.93351
-31.9089	127.001	81.1935	31.2956	2.07027	0	-3	-1.5	3	32.7956	2.55656	-2.46134	2.33899	35.2569	3.4651	This study	SRTM 1-arcsecond, TerraceM	30.2793	21.3816	24.034	7.84684
-31.9053	127.033	84.361	29.3	0.68	0	-3	-1.5	3	30.8	1.64694	-2.46601	2.34038	33.266	2.86178	Rovere et al., 2014	Field measurement, differential GNSS	29.8893	20.9842	23.611	8.02712
-31.9067	127.088	89.6881	30.0375	1.56671	0	-3	-1.5	3	31.5375	2.16901	-2.46929	2.34183	34.0068	3.19198	This study	SRTM 1-arcsecond, TerraceM	29.3416	20.4152	22.9765	8.43759
-31.9031	127.171	97.9532	29.5348	1.29004	0	-3	-1.5	3	31.0348	1.97843	-2.47785	2.34473	33.5127	3.06789	This study	SRTM 1-arcsecond, TerraceM	28.4237	19.4721	21.948	8.99173
-31.9069	127.175	98.3538	29.45	0.28	0	-3	-1.5	3	30.95	1.52591	-2.47576	2.34437	33.4258	2.79723	Rovere et al., 2014	Field measurement, differential GNSS	28.4406	19.4827	21.9461	9.06071
-31.9091	127.26	106.583	26.5548	1.4898	0	-3	-1.5	3	28.0548	2.11412	-2.48073	2.34658	30.5355	3.15847	This study	SRTM 1-arcsecond, TerraceM	27.5998	18.6087	20.9739	9.68192
-31.9065	127.29	109.849	27	3.2	0	-3	-1.5	3	28.5	3.53412	-2.48464	2.34779	30.9846	4.24289	Rovere et al., 2014	SRTM 3-arcseconds, Surface profile	27.2015	18.205	20.5445	9.82409
-31.8923	127.321	113.174	23.0501	1.36856	0	-3	-1.5	3	24.5501	2.03051	-2.49605	2.35052	27.0461	3.10611	This study	SRTM 1-arcsecond, TerraceM	26.5969	17.6103	19.9464	9.86788
-31.8882	127.384	119.548	22.5397	1.26558	0	-3	-1.5	3	24.0397	1.96257	-2.50343	2.3529	26.5432	3.06396	This study	SRTM 1-arcsecond, TerraceM	25.7541	16.7539	19.0405	10.1765
-31.8957	127.468	128.039	21.494	1.38854	0	-3	-1.5	3	22.994	2.04402	-2.50499	2.35441	25.499	3.1179	This study	SRTM 1-arcsecond, TerraceM	24.8242	15.7894	17.9798	10.6844
-31.9174	127.521	133.653	19.62	0.13	0	-3	-1.5	3	21.12	1.50562	-2.49514	2.3532	23.6151	2.79365	Rovere et al., 2014	Field measurement, differential GNSS	24.4781	15.4023	17.48	11.1032
-31.8966	127.553	137.175	17.6234	1.3586	0	-3	-1.5	3	19.1234	2.02381	-2.51084	2.3568	21.6343	3.1065	This study	SRTM 1-arcsecond, TerraceM	23.7813	14.7203	16.8274	11.1455
-31.8956	127.585	140.219	23	3.2	0	-3	-1.5	3	24.5	3.53412	-2.51385	2.35785	27.0139	4.24847	Rovere et al., 2014	SRTM 3-arcseconds, Surface profile	23.3761	14.3068	16.387	11.3088
-31.8926	127.667	148.23	20	3.2	0	-3	-1.5	3	21.5	3.53412	-2.52201	2.36066	24.022	4.25003	Rovere et al., 2014	SRTM 3-arcseconds, Surface profile	22.1978	13.1277	15.0735	11.5688
-31.8874	127.708	152.326	17.1438	1.15169	0	-3	-1.5	3	18.6438	1.89113	-2.52839	2.36252	21.1722	3.0262	This study	SRTM 1-arcsecond, TerraceM	21.5193	12.4591	14.3308	11.6258
-31.884	127.725	154.083	19.2	0.17	0	-3	-1.5	3	20.7	1.5096	-2.53183	2.36345	23.2318	2.80443	Rovere et al., 2014	Field measurement, differential GNSS	21.2206	12.1656	14.0125	11.6421
-31.859	127.781	159.995	21.7487	1.57286	0	-3	-1.5	3	23.2487	2.17345	-2.55203	2.36828	25.8007	3.21445	This study	SRTM 1-arcsecond, TerraceM	20.0186	10.9947	12.8218	11.6187
-31.8533	127.834	165.348	25	3.2	0	-3	-1.5	3	26.5	3.53412	-2.55977	2.3706	29.0598	4.25556	Rovere et al., 2014	SRTM 3-arcseconds, Surface profile	19.1239	10.1107	11.85	11.693
-31.8403	127.867	168.739	22.8004	1.72199	0	-3	-1.5	3	24.3004	2.2837	-2.57056	2.37322	26.8709	3.29355	This study	SRTM 1-arcsecond, TerraceM	18.4328	9.4352	11.1678	11.6827
-31.8355	127.959	177.625	20.3506	1.45318	0	-3	-1.5	3	21.8506	2.08848	-2.58061	2.37655	24.4312	3.16381	This study	SRTM 1-arcsecond, TerraceM	16.9699	7.98463	9.55818	11.831
-31.8432	127.993	181.044	22	3.2	0	-3	-1.5	3	23.5	3.53412	-2.57824	2.37655	26.0782	4.25887	Rovere et al., 2014	SRTM 3-arcseconds, Surface profile	16.5999	7.60329	9.08728	11.9358
-31.8348	128.059	187.531	22.1509	1.51984	0	-3	-1.5	3	23.6509	2.1354	-2.59032	2.38116	26.2412	3.19841	This study	SRTM 1-arcsecond, TerraceM	15.4969	6.49402	7.94249	11.9958
-31.8376	128.098	191.263	19	3.2	0	-3	-1.5	3	20.5	3.53412	-2.59252	2.38296	23.0925	4.26245	Rovere et al., 2014	SRTM 3-arcseconds, Surface profile	14.9847	5.97129	7.35701	12.0768
-31.8246	128.154	196.829	18.1817	1.79304	0	-3	-1.5	3	19.6817	2.33773	-2.60666	2.38768	22.2884	3.34156	This study	SRTM 1-arcsecond, TerraceM	13.9616	4.94792	6.34557	12.0875
-31.8219	128.185	199.819	19	3.2	0	-3	-1.5	3	20.5	3.53412	-2.61158	2.38972	23.1116	4.26624	Rovere et al., 2014	SRTM 3-arcseconds, Surface profile	13.4693	4.45133	5.83008	12.1211
-31.8103	128.239	205.135	16.3357	1.12857	0	-3	-1.5	3	17.8357	1.87714	-2.62461	2.39406	20.4604	3.04224	This study	SRTM 1-arcsecond, TerraceM	12.5084	3.48919	4.88463	12.1316
-31.82	128.292	210.297	18	3.2	0	-3	-1.5	3	19.5	3.53412	-2.62388	2.39586	22.1239	4.26967	Rovere et al., 2014	SRTM 3-arcseconds, Surface profile	11.8914	2.85238	4.1226	12.2823
-31.811	128.329	213.951	16.7175	1.24961	0	-3	-1.5	3	18.2175	1.95231	-2.63353	2.39893	20.851	3.09296	This study	SRTM 1-arcsecond, TerraceM	11.2848	2.25484	3.51503	12.3389
-31.7901	128.419	223.057	16.5432	1.69152	0	-3	-1.5	3	18.0432	2.2608	-2.65628	2.40617	20.6995	3.30165	This study	SRTM 1-arcsecond, TerraceM	10.4626	1.5223	2.49215	12.9778
-31.7939	128.424	223.61	15	3.2	0	-3	-1.5	3	16.5	3.53412	-2.65434	2.40602	19.1543	4.27539	Rovere et al., 2014	SRTM 3-arcseconds, Surface profile	10.4847	1.5459	2.46486	13.0392
-31.7666	128.513	232.68	16.4757	1.77602	0	-3	-1.5	3	17.9757	2.3247	-2.68111	2.41372	20.6568	3.35116	This study	SRTM 1-arcsecond, TerraceM	9.61608	0.781938	1.45649	13.6025
-31.7376	128.593	240.927	17.8316	1.73197	0	-3	-1.5	3	19.3316	2.29123	-2.70801	2.4209	22.0396	3.33324	This study	SRTM 1-arcsecond, TerraceM	8.73446	-0.0104797	0.506914	14.0139
-31.7331	128.663	247.723	14	3.2	0	-3	-1.5	3	15.5	3.53412	-2.71823	2.42499	18.2182	4.28609	Rovere et al., 2014	SRTM 3-arcseconds, Surface profile	8.25881	-0.442938	-0.205029	14.5665
-31.7071	128.786	260.02	13	3.2	0	-3	-1.5	3	14.5	3.53412	-2.74774	2.43377	17.2477	4.29107	Rovere et al., 2014	SRTM 3-arcseconds, Surface profile	6.26833	-2.27664	-2.28712	14.626

## Sheet: Kongo Central (DRC)
Latitude	Longitude	Distance (km)	Inner margin elevation (m)	Elevation error (m)	Upper of IR	Lower limit of IR	RWL (m)	IR (m)	Paleo RSL (m)	Paleo RSL uncertainty (m)	Mean GIA correction (m)	1σ of mean GIA correction (m)	GIA-corrected elevation (m)	GIA-corrected elevation uncertainty (m)	Data source	Profile extraction method	r113a	r73d	r80d	r87a	r91d	r99	r113	r113a
-5.65769	12.2157	2.27927	12.2436	2.68381	1	-2	-0.5	3	12.7436	3.07454	-3.83722	1.99366	16.5808	3.66435	This study	SRTM 1-arcsecond, TerraceM	24.2444	53.4094	41.9209	35.1137	42.7716	49.1657	41.3753	24.2444
-5.71151	12.2489	9.31692	23.9028	6.97976	1	-2	-0.5	3	24.4028	7.13912	-3.84455	1.99613	28.2474	7.41294	This study	SRTM 1-arcsecond, TerraceM	25.3874	53.1763	42.1568	35.6646	42.8131	49.2585	42.5706	25.3874
-5.75511	12.2804	15.3224	23.9398	9.18492	1	-2	-0.5	3	24.4398	9.3066	-3.85221	1.99868	28.292	9.5188	This study	SRTM 1-arcsecond, TerraceM	26.3443	53.1965	42.5135	36.1225	42.9564	49.4801	43.692	26.3443
-5.81022	12.3202	22.965	36.0458	8.43286	1	-2	-0.5	3	36.5458	8.56523	-3.86197	2.00183	40.4078	8.79605	This study	SRTM 1-arcsecond, TerraceM	27.5387	53.0588	42.9038	36.6945	43.1463	49.4533	44.8448	27.5387
-5.85486	12.355	29.2828	36.4082	2.18142	1	-2	-0.5	3	36.9082	2.64738	-3.87094	2.00468	40.7791	3.32074	This study	SRTM 1-arcsecond, TerraceM	28.576	52.6841	43.1635	37.2384	43.3129	48.8004	45.308	28.576
-5.90376	12.3964	36.4167	43.882	5.16809	1	-2	-0.5	3	44.382	5.38137	-3.88204	2.00814	48.264	5.74385	This study	SRTM 1-arcsecond, TerraceM	29.817	52.4538	43.5537	37.9169	43.5983	48.3209	46.0353	29.817
-5.94318	12.4221	41.7995	21.9788	3.69796	1	-2	-0.5	3	22.4788	3.9906	-3.88827	2.0099	26.3671	4.46817	This study	SRTM 1-arcsecond, TerraceM	30.8383	52.1574	43.7224	38.4764	43.7217	48.0929	46.7022	30.8383
-6.25254	12.411	83.196	48.7835	1.71969	1	-2	-0.5	3	49.2835	2.28196	-3.85306	2.00233	53.1366	3.03589	This study	SRTM 1-arcsecond, TerraceM	37.8026	45.7718	41.1372	42.2706	41.763	45.9923	50.3826	37.8026
-6.31206	12.4416	90.5944	46.6964	1.91763	1	-2	-0.5	3	47.1964	2.43461	-3.85884	2.00528	51.0553	3.15411	This study	SRTM 1-arcsecond, TerraceM	39.5528	45.7593	41.5806	43.3973	42.2521	46.0858	51.765	39.5528
-6.37411	12.4777	98.5388	49.4262	2.59765	1	-2	-0.5	3	49.9262	2.99963	-3.86684	2.00885	53.7931	3.61016	This study	SRTM 1-arcsecond, TerraceM	41.385	45.6207	41.9519	44.5242	42.6532	46.1176	53.152	41.385
-6.44178	12.5219	107.48	44.0307	2.25464	1	-2	-0.5	3	44.5307	2.70803	-3.87788	2.01331	48.4086	3.37444	This study	SRTM 1-arcsecond, TerraceM	43.3828	45.2702	42.2107	45.68	42.9236	46.0471	54.5715	43.3828
-6.48083	12.5526	112.974	58.8971	5.18553	1	-2	-0.5	3	59.3971	5.39812	-3.88654	2.0165	63.2836	5.76247	This study	SRTM 1-arcsecond, TerraceM	44.557	44.9914	42.3071	46.3149	43.0062	45.9675	55.3673	44.557
-6.5271	12.579	118.871	67.4618	3.21434	1	-2	-0.5	3	67.9618	3.54711	-3.89299	2.01903	71.8548	4.08148	This study	SRTM 1-arcsecond, TerraceM	45.8092	44.9145	42.66	47.0836	43.3096	46.0344	56.3809	45.8092
-6.68093	12.6727	138.792	71.2729	1.56815	1	-2	-0.5	3	71.7729	2.17004	-3.91802	2.02798	75.6909	2.97015	This study	SRTM 1-arcsecond, TerraceM	49.4462	45.5633	44.771	49.4599	45.0322	46.3151	59.6802	49.4462
-6.7096	12.6938	142.73	66.8996	2.35981	1	-2	-0.5	3	67.3996	2.7962	-3.92445	2.03007	71.324	3.45541	This study	SRTM 1-arcsecond, TerraceM	50.1024	45.7331	45.2297	49.944	45.3912	46.4283	60.3348	50.1024
-6.75596	12.7436	150.257	65.4198	3.87284	1	-2	-0.5	3	65.9198	4.15317	-3.9417	2.03534	69.8615	4.62509	This study	SRTM 1-arcsecond, TerraceM	51.3103	46.0967	46.07	50.8242	45.9975	46.694	61.5031	51.3103
-6.79118	12.7765	155.586	69.2689	3.23682	1	-2	-0.5	3	69.7689	3.56749	-3.9529	2.03871	73.7218	4.10893	This study	SRTM 1-arcsecond, TerraceM	52.2757	46.2014	46.5573	51.5063	46.328	46.8095	62.2962	52.2757

## Sheet: Benghazi (Libya)
Latitude	Longitude	Distance (km)	Inner margin elevation (m)	Elevation error (m)	Upper of IR	Lower limit of IR	RWL (m)	IR (m)	Paleo RSL (m)	Paleo RSL uncertainty (m)	Mean GIA correction (m)	1σ of mean GIA correction (m)	GIA-corrected elevation (m)	GIA-corrected elevation uncertainty (m)	Data source	Profile extraction method
32.5006	20.5957	20.4854	47.8034	4.57748	1	-1	0	2	47.8034	4.68544	-0.551684	1.5934	48.3551	4.94896	This study	SRTM 1-arcsecond, TerraceM
32.469	20.5648	25.1983	55.7805	5.46975	1	-1	0	2	55.7805	5.56041	-0.57457	1.57681	56.3551	5.77966	This study	SRTM 1-arcsecond, TerraceM
32.4271	20.5368	30.7562	50.0731	5.65458	1	-1	0	2	50.0731	5.74233	-0.608805	1.55339	50.6819	5.94873	This study	SRTM 1-arcsecond, TerraceM
32.3745	20.5036	37.4068	91.3334	2.5528	1	-1	0	2	91.3334	2.74167	-0.652291	1.5234	91.9857	3.13648	This study	SRTM 1-arcsecond, TerraceM
32.343	20.4717	42.1808	45.646	4.68668	1	-1	0	2	45.646	4.79217	-0.674319	1.50614	46.3203	5.02329	This study	SRTM 1-arcsecond, TerraceM
32.3009	20.4332	48.2651	85.4364	7.1319	1	-1	0	2	85.4364	7.20166	-0.705099	1.48231	86.1415	7.35263	This study	SRTM 1-arcsecond, TerraceM
32.2688	20.4004	53.158	95.4207	1.8244	1	-1	0	2	95.4207	2.08049	-0.727241	1.46413	96.1479	2.54404	This study	SRTM 1-arcsecond, TerraceM
31.8429	20.4068	104.568	90.5287	3.1371	1	-1	0	2	90.5287	3.29262	-1.16226	1.2549	91.691	3.52365	This study	SRTM 1-arcsecond, TerraceM
31.7832	20.4459	112.393	87.121	3.67457	1	-1	0	2	87.121	3.80821	-1.23409	1.23961	88.3551	4.00488	This study	SRTM 1-arcsecond, TerraceM
31.709	20.4761	121.028	88.4705	2.40349	1	-1	0	2	88.4705	2.60322	-1.317	1.22117	89.7875	2.87542	This study	SRTM 1-arcsecond, TerraceM
31.6367	20.502	129.338	109.085	2.92955	1	-1	0	2	109.085	3.09553	-1.39619	1.20335	110.481	3.32119	This study	SRTM 1-arcsecond, TerraceM
31.5312	20.5337	141.185	95.6853	3.34933	1	-1	0	2	95.6853	3.49543	-1.5091	1.17759	97.1944	3.68846	This study	SRTM 1-arcsecond, TerraceM
31.4416	20.5364	150.833	78.1025	2.60458	1	-1	0	2	78.1025	2.78996	-1.59791	1.15632	79.7004	3.02009	This study	SRTM 1-arcsecond, TerraceM
31.3629	20.5741	160.654	75.3758	2.77659	1	-1	0	2	75.3758	2.95118	-1.68475	1.13693	77.0606	3.1626	This study	SRTM 1-arcsecond, TerraceM
31.322	20.6017	166.129	77.6964	1.99517	1	-1	0	2	77.6964	2.23175	-1.73165	1.12669	79.4281	2.50003	This study	SRTM 1-arcsecond, TerraceM
31.2023	20.5915	178.954	69.8082	2.62384	1	-1	0	2	69.8082	2.80794	-1.84583	1.09868	71.654	3.01523	This study	SRTM 1-arcsecond, TerraceM
31.0938	20.5494	191.4	73.9268	2.78476	1	-1	0	2	73.9268	2.95887	-1.94247	1.07381	75.8693	3.14769	This study	SRTM 1-arcsecond, TerraceM

## Sheet: Mahafaly (Madagascar)
Latitude	Longitude	Distance (km)	Inner margin elevation (m)	Elevation error (m)	Upper of IR	Lower limit of IR	RWL (m)	IR (m)	Paleo RSL (m)	Paleo RSL uncertainty (m)	Mean GIA correction (m)	1σ of mean GIA correction (m)	GIA-corrected elevation (m)	GIA-corrected elevation uncertainty (m)	Data source	Profile extraction method	r115	r115a	r115c	r115d	r116d	r117	r117a	r117b	r115	r115a	r115b	r115c	r115d	r116	r116c	r116d	r117	r117a	r117b	r117c	r117d
-23.6142	43.723	1.02344	13.9591	3.78196	3	-2	0.5	5	13.4591	4.53356	-1.32649	1.71328	14.7856	4.8465	This study	SRTM 1-arcsecond, TerraceM	6.96419	9.80348	3.63217	0.190042	10.1446	-2.81742	-0.130512	2.54754	6.96419	9.80348	12.6394	3.63217	0.190042	17.6748	13.9563	10.1446	-2.81742	-0.130512	2.54754	-5.99864	-9.28831
-23.6852	43.716	8.88998	24.656	6.68716	3	-2	0.5	5	24.156	7.1392	-1.30716	1.69989	25.4631	7.33879	This study	SRTM 1-arcsecond, TerraceM	6.93847	9.79078	3.57805	0.0973445	9.96483	-2.93058	-0.226408	2.46895	6.93847	9.79078	12.6396	3.57805	0.0973445	17.5419	13.8026	9.96483	-2.93058	-0.226408	2.46895	-6.14116	-9.47111
-23.773	43.7001	18.7715	15.4296	1.88521	3	-2	0.5	5	14.9296	3.13113	-1.28225	1.68178	16.2118	3.55421	This study	SRTM 1-arcsecond, TerraceM	6.86957	9.77382	3.43941	-0.124098	9.79289	-3.15704	-0.385616	2.36347	6.86957	9.77382	12.6644	3.43941	-0.124098	17.4766	13.6888	9.79289	-3.15704	-0.385616	2.36347	-6.44509	-9.86632
-23.8335	43.7093	25.6405	27.5467	5.34826	3	-2	0.5	5	27.0467	5.90372	-1.26777	1.674	28.3144	6.13646	This study	SRTM 1-arcsecond, TerraceM	6.76241	9.69728	3.33297	-0.2327	9.6801	-3.33609	-0.521106	2.25861	6.76241	9.69728	12.6088	3.33297	-0.2327	17.3275	13.5581	9.6801	-3.33609	-0.521106	2.25861	-6.63147	-10.0639
-23.9141	43.7359	35.1009	26.1386	8.25274	3	-2	0.5	5	25.6386	8.62309	-1.25044	1.66655	26.889	8.78266	This study	SRTM 1-arcsecond, TerraceM	6.59674	9.55871	3.20523	-0.327725	9.52636	-3.56585	-0.708288	2.0962	6.59674	9.55871	12.4839	3.20523	-0.327725	17.048	13.3398	9.52636	-3.56585	-0.708288	2.0962	-6.83483	-10.2499
-23.9916	43.7331	43.9715	16.6228	6.49486	3	-2	0.5	5	16.1228	6.9594	-1.22998	1.65307	17.3528	7.15303	This study	SRTM 1-arcsecond, TerraceM	6.49749	9.50608	3.069	-0.510466	9.38622	-3.78894	-0.868823	1.98188	6.49749	9.50608	12.4656	3.069	-0.510466	16.9429	13.2198	9.38622	-3.78894	-0.868823	1.98188	-7.10444	-10.5772
-24.1091	43.7617	57.2877	6	5.6	3	-2	0.5	5	5.5	6.1327	-1.20004	1.61621	6.70004	6.34209	This study	SRTM, Surface profile	6.26856	9.30492	2.87695	-0.668142	9.20028	-4.15853	-1.19615	1.68626	6.26856	9.30492	12.284	2.87695	-0.668142	16.6255	12.9659	9.20028	-4.15853	-1.19615	1.68626	-7.45176	-10.9082
-24.2172	43.7805	69.4155	11.2853	6.71811	3	-2	0.5	5	10.7853	7.16819	-1.17128	1.57858	11.9565	7.33995	This study	SRTM 1-arcsecond, TerraceM	6.03137	9.09092	2.65858	-0.845994	9.06326	-4.57759	-1.58362	1.33877	6.03137	9.09092	12.099	2.65858	-0.845994	16.4034	12.7827	9.06326	-4.57759	-1.58362	1.33877	-7.86398	-11.2866
-24.3615	43.8304	86.3416	13.0355	6.64602	3	-2	0.5	5	12.5355	7.10067	-1.13646	1.53155	13.6719	7.26397	This study	SRTM 1-arcsecond, TerraceM	5.64343	8.72694	2.33921	-1.05051	8.82768	-5.17125	-2.14177	0.820849	5.64343	8.72694	11.7618	2.33921	-1.05051	15.9273	12.4151	8.82768	-5.17125	-2.14177	0.820849	-8.41135	-11.7339
-24.6174	43.9451	117.37	28	5.6	3	-2	0.5	5	27.5	6.1327	-1.07898	1.44707	28.579	6.30111	This study	SRTM, Surface profile	5.23015	8.29088	2.12392	-1.0104	8.69141	-5.97421	-2.97318	-0.027062	5.23015	8.29088	11.3103	2.12392	-1.0104	15.2614	11.9882	8.69141	-5.97421	-2.97318	-0.027062	-9.03222	-12.1148
-24.6659	43.9604	122.969	13.3816	5.15889	3	-2	0.5	5	12.8816	5.73273	-1.06722	1.42942	13.9488	5.90825	This study	SRTM 1-arcsecond, TerraceM	5.2178	8.23593	2.12608	-0.993859	8.68837	-6.07886	-3.12085	-0.229867	5.2178	8.23593	11.1978	2.12608	-0.993859	15.2314	11.9718	8.68837	-6.07886	-3.12085	-0.229867	-9.12007	-12.1852
-24.7191	43.9829	129.351	32.0219	4.90382	3	-2	0.5	5	31.5219	5.50431	-1.05518	1.41051	32.5771	5.68217	This study	SRTM 1-arcsecond, TerraceM	5.20188	8.15401	2.1335	-0.963187	8.67139	-6.18922	-3.29642	-0.493582	5.20188	8.15401	11.0234	2.1335	-0.963187	15.1689	11.9322	8.67139	-6.18922	-3.29642	-0.493582	-9.20502	-12.2439

## Sheet: Al Wusta (Oman)
Latitude	Longitude	Distance (km)	Inner margin elevation (m)	Elevation error (m)	Upper of IR	Lower limit of IR	RWL (m)	IR (m)	Paleo RSL (m)	Paleo RSL uncertainty (m)	Mean GIA correction (m)	1σ of mean GIA correction (m)	GIA-corrected elevation (m)	GIA-corrected elevation uncertainty (m)	Data source	Profile extraction method	r115c	r116d	r117	r117c
18.1929	56.5363	1.32078	32.816	2.92056	3	-2	0.5	5	32.316	3.84443	-3.82795	1.47275	36.1439	4.11687	This study	SRTM 1-arcsecond, TerraceM	25.0502	30.8466	16.6675	32.9607
18.2459	56.5063	7.88838	31.0439	3.19864	3	-2	0.5	5	30.5439	4.05971	-3.84871	1.49061	34.3927	4.32472	This study	SRTM 1-arcsecond, TerraceM	23.3296	28.3996	14.3297	30.7748
18.3735	56.4627	23.0557	33.1486	5.33521	3	-2	0.5	5	32.6486	5.8919	-3.89201	1.53056	36.5406	6.08745	This study	SRTM 1-arcsecond, TerraceM	20.3113	23.8692	9.80482	26.7779
18.4449	56.4552	30.7911	23.9147	6.16412	3	-2	0.5	5	23.4147	6.6518	-3.91279	1.55092	27.3275	6.83021	This study	SRTM 1-arcsecond, TerraceM	19.1439	21.9714	7.84845	25.1318
18.5655	56.481	44.201	32.8433	3.89051	3	-2	0.5	5	32.3433	4.62451	-3.94145	1.57989	36.2848	4.88694	This study	SRTM 1-arcsecond, TerraceM	18.1278	19.8724	6.01451	23.3661
18.7612	56.7519	80.8971	20.1572	2.52312	3	-2	0.5	5	19.6572	3.55192	-3.95742	1.5902	23.6146	3.89164	This study	SRTM 1-arcsecond, TerraceM	19.885	21.1427	7.43951	24.8207
18.8034	56.8307	90.513	18.5301	3.37418	3	-2	0.5	5	18.0301	4.19941	-3.95961	1.5883	21.9897	4.48974	This study	SRTM 1-arcsecond, TerraceM	19.8603	21.0922	7.34189	24.7978
18.835	56.9056	99.2597	19.8851	2.1805	3	-2	0.5	5	19.3851	3.31732	-3.95964	1.58406	23.3447	3.67612	This study	SRTM 1-arcsecond, TerraceM	20.1215	21.4214	7.56169	25.1124
18.8654	56.9895	108.854	20.585	1.98105	3	-2	0.5	5	20.085	3.18976	-3.95861	1.57775	24.0436	3.55863	This study	SRTM 1-arcsecond, TerraceM	20.4589	21.8258	8.04664	25.5141
18.8956	57.1354	124.881	24.9766	2.57157	3	-2	0.5	5	24.4766	3.5865	-3.94027	1.56201	28.4169	3.91188	This study	SRTM 1-arcsecond, TerraceM	20.6055	22.1308	9.1091	25.8327
18.9267	57.2488	137.527	14.1818	2.95445	3	-2	0.5	5	13.6818	3.87024	-3.92869	1.55126	17.6105	4.16955	This study	SRTM 1-arcsecond, TerraceM	20.6232	22.2839	9.83392	25.9333

## Sheet: De Hoop (South Africa)
Latitude	Longitude	Distance (km)	Inner margin elevation (m)	Elevation error (m)	Upper of IR	Lower limit of IR	RWL (m)	IR (m)	Paleo RSL (m)	Paleo RSL uncertainty (m)	Mean GIA correction (m)	1σ of mean GIA correction (m)	GIA-corrected elevation (m)	GIA-corrected elevation uncertainty (m)	Data source	Profile extraction method	r111c	r112	r114a	r109c	r109d	r111	r111a	r111c	r111d	r112	r112a	r112c	r114a	r114b
-34.6748	19.9245	0.334721	22.52	0.2	0	-3	-1.5	3	24.02	1.51327	-2.16557	2.1589	26.1856	2.63645	Rovere et al., 2014	Field measurement, differential GNSS	21.8726	21.2834	21.7258	29.5735	25.9371	26.1223	30.4151	21.8726	17.6627	21.2834	28.2304	14.4359	21.7258	29.2866
-34.6511	19.9435	3.24798	35.8573	5.79177	0	-3	-1.5	3	37.3573	5.98286	-2.1819	2.16407	39.5392	6.36222	This study	SRTM 1-arcsecond, TerraceM	21.165	20.5144	20.9193	28.9039	25.2434	25.4266	29.7177	21.165	16.932	20.5144	27.4787	13.6169	20.9193	28.4675
-34.6425	19.9529	4.47196	25	2.55	0	-3	-1.5	3	26.5	2.95846	-2.18804	2.16631	28.688	3.66679	Rovere et al., 2014	SRTM 3-arcseconds, Surface profile	20.8839	20.2136	20.5958	28.6404	24.9694	25.1503	29.4406	20.8839	16.6409	20.2136	27.1828	13.2982	20.5958	28.1382
-34.6304	19.9704	6.50786	20	2.55	0	-3	-1.5	3	21.5	2.95846	-2.19697	2.17005	23.697	3.66901	Rovere et al., 2014	SRTM 3-arcseconds, Surface profile	20.4507	19.7569	20.0927	28.2385	24.5501	24.7249	29.0138	20.4507	16.191	19.7569	26.7313	12.8169	20.0927	27.6251
-34.6228	19.9799	7.67483	23.6991	4.15123	0	-3	-1.5	3	25.1991	4.41393	-2.2025	2.17219	27.4016	4.91946	This study	SRTM 1-arcsecond, TerraceM	20.1925	19.4851	19.7936	27.9976	24.299	24.471	28.7583	20.1925	15.9229	19.4851	26.4607	12.5304	19.7936	27.3197
-34.6161	19.9868	8.59615	20	2.55	0	-3	-1.5	3	21.5	2.95846	-2.20727	2.17385	23.7073	3.67126	Rovere et al., 2014	SRTM 3-arcseconds, Surface profile	19.9798	19.2608	19.5484	27.7978	24.091	24.2617	28.5472	19.9798	15.7022	19.2608	26.2362	12.2937	19.5484	27.0692
-34.5747	20.0614	16.8911	22	2.55	0	-3	-1.5	3	23.5	2.95846	-2.23575	2.18701	25.7358	3.67907	Rovere et al., 2014	SRTM 3-arcseconds, Surface profile	18.4071	17.7114	17.7541	26.3537	22.6142	22.6951	26.9681	18.4071	14.1	17.7114	24.658	10.726	17.7541	25.2
-34.5746	20.0637	17.1145	24.0599	3.54249	0	-3	-1.5	3	25.5599	3.84698	-2.23585	2.18729	27.7957	4.42533	This study	SRTM 1-arcsecond, TerraceM	18.3835	17.6953	17.7293	26.3339	22.5945	22.6717	26.9451	18.3835	14.0765	17.6953	24.6412	10.7105	17.7293	25.172
-34.5574	20.1096	21.8575	25.3314	2.89763	0	-3	-1.5	3	26.8314	3.26286	-2.2477	2.19437	29.0791	3.93212	This study	SRTM 1-arcsecond, TerraceM	17.6012	17.0619	16.919	25.629	21.9003	21.882	26.1565	17.6012	13.3065	17.0619	23.982	10.0995	16.919	24.2818
-34.5535	20.1634	27.0165	28.2817	3.07867	0	-3	-1.5	3	29.7817	3.42465	-2.25117	2.20106	32.0328	4.07098	This study	SRTM 1-arcsecond, TerraceM	17.0118	16.6773	16.3222	25.1257	21.3992	21.2945	25.5788	17.0118	12.7199	16.6773	23.5771	9.73022	16.3222	23.6039
-34.5549	20.1717	27.8289	25	2.55	0	-3	-1.5	3	26.5	2.95846	-2.25043	2.20191	28.7504	3.68794	Rovere et al., 2014	SRTM 3-arcseconds, Surface profile	16.9613	16.6564	16.2696	25.0882	21.3607	21.2456	25.5323	16.9613	12.6683	16.6564	23.5549	9.71026	16.2696	23.5412
-34.5522	20.1938	29.9544	23	2.55	0	-3	-1.5	3	24.5	2.95846	-2.25261	2.20476	26.7526	3.68964	Rovere et al., 2014	SRTM 3-arcseconds, Surface profile	16.6949	16.4793	16.0034	24.8572	21.1313	20.9791	25.2694	16.6949	12.4038	16.4793	23.368	9.54029	16.0034	23.2396
-34.5369	20.226	33.369	25	2.55	0	-3	-1.5	3	26.5	2.95846	-2.26299	2.21003	28.763	3.6928	Rovere et al., 2014	SRTM 3-arcseconds, Surface profile	16.0683	16.0244	15.4016	24.2844	20.5683	20.3446	24.636	16.0683	11.7885	16.0244	22.8855	9.10396	15.4016	22.5666
-34.5232	20.2394	35.2076	28.3917	2.85182	0	-3	-1.5	3	29.8917	3.22225	-2.27204	2.21295	32.1637	3.90897	This study	SRTM 1-arcsecond, TerraceM	15.6508	15.712	15.0147	23.8903	20.1831	19.9185	24.2079	15.6508	11.3811	15.712	22.5522	8.80463	15.0147	22.1362
-34.5133	20.2523	36.7648	23	2.55	0	-3	-1.5	3	24.5	2.95846	-2.27867	2.21544	26.7787	3.69603	Rovere et al., 2014	SRTM 3-arcseconds, Surface profile	15.3163	15.4752	14.7086	23.5776	19.8769	19.578	23.8668	15.3163	11.054	15.4752	22.2983	8.57817	14.7086	21.7924
-34.504	20.2671	38.4314	30.8797	2.26394	0	-3	-1.5	3	32.3797	2.71577	-2.28488	2.21807	34.6646	3.50646	This study	SRTM 1-arcsecond, TerraceM	14.9772	15.2474	14.4021	23.263	19.5682	19.2334	23.5225	14.9772	10.7217	15.2474	22.0528	8.36073	14.4021	21.4452
-34.4856	20.3087	42.7918	23	2.55	0	-3	-1.5	3	24.5	2.95846	-2.29755	2.22476	26.7976	3.70163	Rovere et al., 2014	SRTM 3-arcseconds, Surface profile	14.1752	14.7582	13.6935	22.5283	18.8455	18.421	22.7146	14.1752	9.93348	14.7582	21.5196	7.89558	13.6935	20.6302
-34.4834	20.3212	44.0093	30.8547	2.14071	0	-3	-1.5	3	32.3547	2.61393	-2.29918	2.22645	34.6539	3.43361	This study	SRTM 1-arcsecond, TerraceM	14.0054	14.6713	13.5453	22.3782	18.6968	18.2504	22.5467	14.0054	9.76532	14.6713	21.4234	7.81346	13.5453	20.4555
-34.465	20.3352	46.2256	25	2.55	0	-3	-1.5	3	26.5	2.95846	-2.31135	2.22989	28.8113	3.70471	Rovere et al., 2014	SRTM 3-arcseconds, Surface profile	13.4691	14.3265	13.095	21.8656	18.1963	17.7015	21.9959	13.4691	9.24283	14.3265	21.0451	7.48598	13.095	19.9411
-34.4618	20.3579	48.4343	18.0451	1.87549	0	-3	-1.5	3	19.5451	2.40156	-2.31386	2.23287	21.859	3.27921	This study	SRTM 1-arcsecond, TerraceM	13.1729	14.1925	12.846	21.6048	17.9376	17.4043	21.7041	13.1729	8.94911	14.1925	20.8935	7.36033	12.846	19.643
-34.4583	20.3605	48.8458	23	2.55	0	-3	-1.5	3	24.5	2.95846	-2.31615	2.23351	26.8161	3.70689	Rovere et al., 2014	SRTM 3-arcseconds, Surface profile	13.0722	14.1311	12.764	21.5084	17.8434	17.3012	21.6008	13.0722	8.85103	14.1311	20.8255	7.30225	12.764	19.5484
-34.4543	20.3978	52.4464	28.32	1	0	-3	-1.5	3	29.82	1.80278	-2.31949	2.23829	32.1395	2.87401	Rovere et al., 2014	Field measurement, differential GNSS	12.612	13.9783	12.3917	21.1055	17.4436	16.8419	21.1516	12.612	8.39435	13.9783	20.6225	7.1832	12.3917	19.0685
-34.4544	20.4132	53.9167	10.9436	1.59677	0	-3	-1.5	3	12.4436	2.19082	-2.31974	2.24009	14.7633	3.13331	This study	SRTM 1-arcsecond, TerraceM	12.4643	14.0102	12.2866	20.9806	17.3193	16.699	21.0142	12.4643	8.24747	14.0102	20.5988	7.26368	12.2866	18.8757
-34.4506	20.4245	55.0593	25	2.55	0	-3	-1.5	3	26.5	2.95846	-2.32241	2.24179	28.8224	3.71189	Rovere et al., 2014	SRTM 3-arcseconds, Surface profile	12.2705	13.977	12.1415	20.8039	17.1457	16.5064	20.8255	12.2705	8.05713	13.977	20.5189	7.26885	12.1415	18.6573
-34.4491	20.4415	56.6931	23	2.55	0	-3	-1.5	3	24.5	2.95846	-2.32377	2.24393	26.8238	3.71318	Rovere et al., 2014	SRTM 3-arcseconds, Surface profile	12.0695	13.9864	11.9944	20.6283	16.9719	16.3102	20.6357	12.0695	7.8583	13.9864	20.4644	7.33288	11.9944	18.4098
-34.4533	20.4689	59.37	27	4	0	-3	-1.5	3	28.5	4.272	-2.32161	2.24674	30.8216	4.82678	This study	SRTM 3-arcseconds, Surface profile	11.8951	14.1035	11.8786	20.4942	16.8365	16.1465	20.482	11.8951	7.68258	14.1035	20.4881	7.534	11.8786	18.1463

## Sheet: Socotra (Yemen)
Latitude	Longitude	Distance (km)	Inner margin elevation (m)	Elevation error (m)	Upper of IR	Lower limit of IR	RWL (m)	IR (m)	Paleo RSL (m)	Paleo RSL uncertainty (m)	Mean GIA correction (m)	1σ of mean GIA correction (m)	GIA-corrected elevation (m)	GIA-corrected elevation uncertainty (m)	Data source	Profile extraction method	r117	r115c	r116d	r117
12.3396	53.597	1.07723	19.5502	3.44984	3	-3	0	6	19.5502	4.57181	-2.45953	1.17883	22.0097	4.72134	This study	SRTM 1-arcsecond, TerraceM	23.236	31.1067	18.8555	23.236
12.3379	53.6164	3.22511	31.4943	7.104	3	-3	0	6	31.4943	7.71147	-2.45194	1.17622	33.9463	7.80066	This study	SRTM 1-arcsecond, TerraceM	23.5432	31.5633	19.3761	23.5432
12.3395	53.6539	7.56285	36.768	3.6651	3	-3	0	6	36.768	4.73635	-2.43809	1.17162	39.2061	4.87911	This study	SRTM 1-arcsecond, TerraceM	24.0922	32.3842	20.3478	24.0922
12.3362	53.6712	9.52928	32.5364	6.90524	3	-3	0	6	32.5364	7.52877	-2.431	1.16912	34.9674	7.619	This study	SRTM 1-arcsecond, TerraceM	24.3789	32.8129	20.8255	24.3789
12.3359	53.7314	16.45	39.9422	7.76542	3	-3	0	6	39.9422	8.32477	-2.40823	1.16144	42.3504	8.4054	This study	SRTM 1-arcsecond, TerraceM	25.2836	34.1681	22.4087	25.2836
12.3357	53.7593	19.5827	43.6599	2.50622	3	-3	0	6	43.6599	3.90911	-2.39766	1.15787	46.0575	4.07699	This study	SRTM 1-arcsecond, TerraceM	25.7036	34.7977	23.1438	25.7036
12.3393	53.7882	22.8473	45.161	5.33064	3	-3	0	6	45.161	6.11684	-2.3875	1.15459	47.5484	6.22485	This study	SRTM 1-arcsecond, TerraceM	26.1118	35.3985	23.8679	26.1118
12.3504	53.8268	27.3825	74.8936	6.96257	3	-3	0	6	74.8936	7.58138	-2.37536	1.15092	77.269	7.66824	This study	SRTM 1-arcsecond, TerraceM	26.8113	35.8759	24.6522	26.8113
12.3596	53.848	29.9718	73.5131	4.30203	3	-3	0	6	73.5131	5.24475	-2.36947	1.1493	75.8826	5.3692	This study	SRTM 1-arcsecond, TerraceM	27.1843	36.1087	25.0626	27.1843
12.3732	53.9023	36.2856	56.3592	3.27519	3	-3	0	6	56.3592	4.44149	-2.35258	1.14417	58.7118	4.5865	This study	SRTM 1-arcsecond, TerraceM	28.2126	36.8506	26.2186	28.2126
12.3692	53.9311	39.4842	53.3438	3.27701	3	-3	0	6	53.3438	4.44284	-2.34103	1.14014	55.6848	4.5868	This study	SRTM 1-arcsecond, TerraceM	28.823	37.3668	26.9218	28.823
12.3727	53.969	43.7552	50.1507	2.6576	3	-3	0	6	50.1507	4.00785	-2.32793	1.13589	52.4787	4.16571	This study	SRTM 1-arcsecond, TerraceM	29.5831	37.9641	27.7877	29.5831
12.3849	54.0153	49.0684	45.1138	4.6406	3	-3	0	6	45.1138	5.52587	-2.31393	1.13192	47.4277	5.64061	This study	SRTM 1-arcsecond, TerraceM	30.4833	38.6437	28.8091	30.4833
12.3907	54.0434	52.2364	42.1456	3.58234	3	-3	0	6	42.1456	4.67259	-2.30482	1.12949	44.4504	4.80717	This study	SRTM 1-arcsecond, TerraceM	31.0415	39.0803	29.446	31.0415
12.3984	54.0954	58.3158	36.4722	3.94009	3	-3	0	6	36.4722	4.95221	-2.28722	1.12464	38.7594	5.0783	This study	SRTM 1-arcsecond, TerraceM	32.0972	39.929	30.6561	32.0972
12.4237	54.1767	68.5072	39.7005	3.1614	3	-3	0	6	39.7005	4.35826	-2.26404	1.11912	41.9645	4.49965	This study	SRTM 1-arcsecond, TerraceM	34.1211	42.0561	33.2669	34.1211
12.4237	54.2092	72.0809	36.7607	2.64688	3	-3	0	6	36.7607	4.00075	-2.25192	1.11552	39.0126	4.15336	This study	SRTM 1-arcsecond, TerraceM	35.1497	43.3588	34.7072	35.1497
12.4279	54.2287	74.2999	23.8035	4.8407	3	-3	0	6	23.8035	5.69494	-2.24593	1.11398	26.0494	5.80287	This study	SRTM 1-arcsecond, TerraceM	35.7579	44.1278	35.5682	35.7579

## Sheet: Nome (Alaska, USA)
Latitude	Longitude	Distance (km)	Inner margin elevation (m)	Elevation error (m)	Upper of IR	Lower limit of IR	RWL (m)	IR (m)	Paleo RSL (m)	Paleo RSL uncertainty (m)	Mean GIA correction (m)	1σ of mean GIA correction (m)	GIA-corrected elevation (m)	GIA-corrected elevation uncertainty (m)	Data source	Profile extraction method	r73a	r73b	r80c	r80d	r81c	r81d	r110d	r112	r112a	r112c	r112d	r114	r114a	r114b	r114c	r73	r73a	r73b	r73c	r75a	r75b	r79d	r80	r80c	r80d	r81	r81c	r81d	r110c	r110d	r112	r112a	r112b
64.5723	-165.765	4.1079	53	8.68	1	-1	0	2	53	8.73741	6.4871	7.98634	46.5129	11.8374	This study	Surface profile from EarthEnv-DEM90	41.1436	34.8577	19.372	29.1714	18.1077	25.8382	25.7197	28.8693	21.2825	36.3727	43.8125	37.4042	29.751	21.9836	45.0015	47.4213	41.1436	34.8577	53.7288	54.4872	48.3016	11.462	9.67483	19.372	29.1714	10.4993	18.1077	25.8382	16.2917	25.7197	28.8693	21.2825	13.5486
64.57	-165.718	6.6668	51	8.68	1	-1	0	2	51	8.73741	6.46522	7.98627	44.5348	11.8373	This study	Surface profile from EarthEnv-DEM90	40.8802	34.632	18.5279	28.524	17.5408	25.4231	25.3477	28.6858	21.1454	36.1419	43.5383	37.1667	29.5523	21.8198	44.7239	47.1197	40.8802	34.632	53.3858	54.116	47.9597	11.1633	8.71485	18.5279	28.524	9.84864	17.5408	25.4231	15.7348	25.3477	28.6858	21.1454	13.4538
64.5496	-165.392	24.7715	50	8.68	1	-1	0	2	50	8.73741	6.31353	7.98439	43.6865	11.8361	This study	Surface profile from EarthEnv-DEM90	36.6731	30.8222	9.57817	19.7928	11.0951	19.1021	18.9716	25.3326	18.03	32.5734	39.7522	33.2373	25.8199	18.3366	40.6106	42.6643	36.6731	30.8222	48.7339	48.9049	43.0848	5.78602	-0.443038	9.57817	19.7928	3.28172	11.0951	19.1021	9.10835	18.9716	25.3326	18.03	10.6446
64.5375	-165.313	29.1878	84	8.68	1	-1	0	2	84	8.73741	6.2775	7.98155	77.7225	11.8342	This study	Surface profile from EarthEnv-DEM90	35.1044	29.3947	6.20488	16.2379	8.61197	16.4571	16.237	24.0461	16.7909	31.2531	38.3925	31.7644	24.3859	16.9723	39.1085	41.0281	35.1044	29.3947	47.0618	47.0284	41.3316	3.46207	-3.73395	6.20488	16.2379	0.875126	8.61197	16.4571	6.5215	16.237	24.0461	16.7909	9.4921
[truncated: 7 more columns]

## Sheet: East Coast (USA)
Latitude	Longitude	Distance (km)	Inner margin elevation (m)	Elevation error (m)	Upper of IR	Lower limit of IR	RWL (m)	IR (m)	Paleo RSL (m)	Paleo RSL uncertainty (m)	Mean GIA correction (m)	1σ of mean GIA correction (m)	GIA-corrected elevation (m)	GIA-corrected elevation uncertainty (m)	Data source	Profile extraction method	r75	r75a	r75c	r75d
31.4407	-81.9774	4.33656	24	5	-3	-7	-5	4	29	5.38516	8.61441	12.0538	20.3856	13.2021	This study	SRTM 3-arcseconds, Surface profile	-10.2234	-11.0523	-9.23783	-8.06443
31.5461	-81.932	16.1628	18	5	-3	-7	-5	4	23	5.38516	8.51075	12.1087	14.4893	13.2522	This study	SRTM 3-arcseconds, Surface profile	-10.5372	-11.4043	-9.53561	-8.47357
31.6266	-81.8932	25.3852	27	5	-3	-7	-5	4	32	5.38516	8.43646	12.1552	23.5635	13.2947	This study	SRTM 3-arcseconds, Surface profile	-10.6692	-11.5946	-9.65288	-8.68976
31.895	-81.8294	53.8499	31	5	-3	-7	-5	4	36	5.38516	8.08846	12.2424	27.9115	13.3745	This study	SRTM 3-arcseconds, Surface profile	-11.9567	-13.1074	-10.7853	-9.77448
31.9331	-81.8367	57.8489	34	2.32	-3	-7	-5	4	39	3.06307	8.01528	12.2375	30.9847	12.615	Rovere et al. 2015	Field measurement, differential GNSS	-12.4733	-13.6454	-11.2804	-10.2233
31.9415	-81.838	58.7247	34.36	2.55	-3	-7	-5	4	39.36	3.24076	7.99968	12.2368	31.3603	12.6586	Rovere et al., 2014 as modified by Rovere et al., 2015	1/3 arc-second elevation data from the National Elevation Dataset	-12.5792	-13.756	-11.3816	-10.3139
32.0086	-81.818	65.9448	31.74	2.55	-3	-7	-5	4	36.74	3.24076	7.91653	12.2593	28.8235	12.6804	Rovere et al., 2014 as modified by Rovere et al., 2015	1/3 arc-second elevation data from the National Elevation Dataset	-12.8309	-14.0335	-11.6074	-10.459
32.0137	-81.8165	66.4916	37	5	-3	-7	-5	4	42	5.38516	7.90975	12.2591	34.0903	13.3898	This study	SRTM 3-arcseconds, Surface profile	-12.8508	-14.0552	-11.6255	-10.4713
32.07	-81.7997	72.5482	32.8	2.55	-3	-7	-5	4	37.8	3.24076	7.83444	12.2566	29.9656	12.6778	Rovere et al., 2014 as modified by Rovere et al., 2015	1/3 arc-second elevation data from the National Elevation Dataset	-13.0759	-14.2985	-11.8324	-10.6183
32.0821	-81.8058	73.9477	47	5	-3	-7	-5	4	52	5.38516	7.80468	12.246	44.1953	13.3777	This study	SRTM 3-arcseconds, Surface profile	-13.3124	-14.5439	-12.06	-10.8295
32.0945	-81.7919	75.8687	32.8	2.55	-3	-7	-5	4	37.8	3.24076	7.80215	12.2558	29.9979	12.677	Rovere et al., 2014 as modified by Rovere et al., 2015	1/3 arc-second elevation data from the National Elevation Dataset	-13.1685	-14.3978	-11.9182	-10.6804
32.2537	-81.7327	93.3813	50	5	-3	-7	-5	4	55	5.38516	7.59933	12.2547	47.4007	13.3858	This study	SRTM 3-arcseconds, Surface profile	-12.9956	-14.3277	-11.5477	-10.1149
32.3284	-81.6939	102.059	44	5	-3	-7	-5	4	49	5.38516	7.51584	12.2619	41.4842	13.3923	This study	SRTM 3-arcseconds, Surface profile	-12.7785	-14.125	-11.2224	-9.66106
32.3326	-81.6892	102.711	41.88	3.54	-3	-7	-5	4	46.88	4.06591	7.51445	12.2646	39.3656	12.921	Rovere et al. 2015	Field measurement, differential GNSS	-12.7342	-14.0763	-11.1742	-9.60418
32.3615	-81.6684	106.384	40.82	1.44	-3	-7	-5	4	45.82	2.46447	7.48887	12.272	38.3311	12.517	Rovere et al., 2014 as modified by Rovere et al., 2015	Field measurement, differential GNSS	-12.615	-13.9431	-11.019	-9.38877
32.3808	-81.6504	109.102	40.18	2.55	-3	-7	-5	4	45.18	3.24076	7.47677	12.2804	37.7032	12.7008	Rovere et al., 2014 as modified by Rovere et al., 2015	1/3 arc-second elevation data from the National Elevation Dataset	-12.4988	-13.8063	-10.8825	-9.20708
32.3937	-81.6533	110.467	45	5	-3	-7	-5	4	50	5.38516	7.44962	12.2723	42.5504	13.4019	This study	SRTM 3-arcseconds, Surface profile	-12.6183	-13.9395	-10.9765	-9.27727
32.4479	-81.6242	116.807	41.41	2.55	-3	-7	-5	4	46.41	3.24076	7.3873	12.2753	39.0227	12.6958	Rovere et al., 2014 as modified by Rovere et al., 2015	1/3 arc-second elevation data from the National Elevation Dataset	-12.6347	-13.9244	-10.9207	-9.09195
32.4729	-81.6137	119.607	48	5	-3	-7	-5	4	53	5.38516	7.35448	12.2736	45.6455	13.4031	This study	SRTM 3-arcseconds, Surface profile	-12.6991	-13.9756	-10.9498	-9.05901
32.5637	-81.5623	130.371	43.78	2.55	-3	-7	-5	4	48.78	3.24076	7.24983	12.2772	41.5302	12.6977	Rovere et al., 2014 as modified by Rovere et al., 2015	1/3 arc-second elevation data from the National Elevation Dataset	-12.4232	-13.5161	-10.8372	-9.04422
32.572	-81.56	131.257	53	5	-3	-7	-5	4	58	5.38516	7.23712	12.2752	50.7629	13.4045	This study	SRTM 3-arcseconds, Surface profile	-12.4007	-13.4842	-10.8356	-9.06856
32.6116	-81.5217	136.942	39.45	2.22	-3	-7	-5	4	44.45	2.98804	7.20893	12.2884	37.2411	12.6465	Rovere et al. 2015	Field measurement, differential GNSS	-11.8073	-12.8234	-10.3966	-8.81952
32.6275	-81.5055	139.282	41	2.55	-3	-7	-5	4	46	3.24076	7.19831	12.2941	38.8017	12.7141	Rovere et al., 2014 as modified by Rovere et al., 2015	1/3 arc-second elevation data from the National Elevation Dataset	-11.5513	-12.5427	-10.1986	-8.6929
32.6442	-81.5029	141.018	43	5	-3	-7	-5	4	48	5.38516	7.17009	12.2882	40.8299	13.4164	This study	SRTM 3-arcseconds, Surface profile	-11.5355	-12.5144	-10.2128	-8.74479
33.0181	-81.319	185.623	59.9	1.18	-3	-7	-5	4	64.9	2.32215	6.65114	12.2323	58.2489	12.4508	Rovere et al. 2015	Field measurement, differential GNSS	-7.73241	-8.81773	-6.60031	-5.44491
33.029	-81.3089	187.149	51	5	-3	-7	-5	4	56	5.38516	6.63626	12.2348	49.3637	13.3675	This study	SRTM 3-arcseconds, Surface profile	-7.48354	-8.58323	-6.34133	-5.17741
33.0407	-81.2951	189.015	59.11	1.38	-3	-7	-5	4	64.11	2.4299	6.62294	12.2392	57.4871	12.4781	Rovere et al., 2014 as modified by Rovere et al., 2015	Field measurement, differential GNSS	-7.15343	-8.26866	-6.00057	-4.82773
33.0683	-81.2513	194.351	53	5	-3	-7	-5	4	58	5.38516	6.60272	12.2561	51.3973	13.3871	This study	SRTM 3-arcseconds, Surface profile	-6.13023	-7.28198	-4.95253	-3.75867
33.1756	-81.1496	210.033	54	5	-3	-7	-5	4	59	5.38516	6.44864	12.2716	52.5514	13.4012	This study	SRTM 3-arcseconds, Surface profile	-4.00969	-5.22361	-2.73559	-1.40968
33.1907	-81.1413	211.815	51.69	2.55	-3	-7	-5	4	56.69	3.24076	6.42047	12.2695	50.2695	12.6903	Rovere et al. 2015	1/3 arc-second elevation data from the National Elevation Dataset	-3.85628	-5.07537	-2.56916	-1.22337
33.3022	-81.0547	227.186	49.75	2.9	-3	-7	-5	4	54.75	3.52278	6.23244	12.2636	48.5176	12.7596	Rovere et al. 2015	Field measurement, differential GNSS	-3.13964	-4.1427	-1.9473	-0.657461
33.3018	-81.0446	228.224	52	5	-3	-7	-5	4	57	5.38516	6.24265	12.2691	50.7573	13.3989	This study	SRTM 3-arcseconds, Surface profile	-3.00482	-3.99074	-1.82361	-0.539597
33.3859	-80.9826	238.997	55.6	2.55	-3	-7	-5	4	60.6	3.24076	6.09688	12.2608	54.5031	12.6819	Rovere et al. 2015	1/3 arc-second elevation data from the National Elevation Dataset	-2.29536	-3.08681	-1.23132	-0.0594785
33.411	-80.9606	242.444	65	5	-3	-7	-5	4	70	5.38516	6.05988	12.263	63.9401	13.3934	This study	SRTM 3-arcseconds, Surface profile	-1.99823	-2.7187	-0.982063	0.141125
33.4122	-80.9336	245.226	61.73	2.55	-3	-7	-5	4	66.73	3.24076	6.0871	12.2814	60.6429	12.7018	Rovere et al., 2014 as modified by Rovere et al., 2015	1/3 arc-second elevation data from the National Elevation Dataset	-1.59369	-2.25756	-0.61953	0.470132
33.4371	-80.9052	249.118	64	5	-3	-7	-5	4	69	5.38516	6.05715	12.2874	62.9429	13.4156	This study	SRTM 3-arcseconds, Surface profile	-1.1693	-1.74396	-0.259817	0.763268
33.5025	-80.845	258.286	66.23	1.38	-3	-7	-5	4	71.23	2.4299	5.96016	12.2903	65.2698	12.5282	Rovere et al., 2014 as modified by Rovere et al., 2015	Field measurement, differential GNSS	-0.183433	-0.568783	0.567302	1.40745
33.5162	-80.8164	261.558	64.52	2.55	-3	-7	-5	4	69.52	3.24076	5.95661	12.3009	63.5634	12.7206	Rovere et al. 2015	1/3 arc-second elevation data from the National Elevation Dataset	0.303208	-0.0613443	1.00721	1.78828
33.5344	-80.8042	263.812	64.17	2.52	-3	-7	-5	4	69.17	3.2172	5.92389	12.2977	63.2461	12.7116	Rovere et al. 2015	Field measurement, differential GNSS	0.52763	0.184898	1.20203	1.94204
33.5369	-80.7936	264.938	65	5	-3	-7	-5	4	70	5.38516	5.92906	12.3031	64.0709	13.43	This study	SRTM 3-arcseconds, Surface profile	0.710196	0.370353	1.37081	2.09394
33.5404	-80.79	265.455	65.4	2.55	-3	-7	-5	4	70.4	3.24076	5.92395	12.3032	64.4761	12.7229	Rovere et al., 2014 as modified by Rovere et al., 2015	1/3 arc-second elevation data from the National Elevation Dataset	0.775074	0.439049	1.42894	2.14293
33.6014	-80.7469	273.156	64	5	-3	-7	-5	4	69	5.38516	5.81518	12.292	63.1848	13.4199	This study	SRTM 3-arcseconds, Surface profile	1.74314	1.37791	2.33453	2.97874
33.6017	-80.7321	274.678	62.14	2.55	-3	-7	-5	4	67.14	3.24076	5.82983	12.3009	61.3102	12.7206	Rovere et al. 2015	1/3 arc-second elevation data from the National Elevation Dataset	2.0129	1.64719	2.59094	3.21926
33.6222	-80.678	280.644	61.29	1.64	-3	-7	-5	4	66.29	2.58643	5.83391	12.3205	60.4561	12.5891	Rovere et al. 2015	Field measurement, differential GNSS	3.10817	2.73087	3.6368	4.20648
33.6543	-80.6514	284.941	65	5	-3	-7	-5	4	70	5.38516	5.77877	12.3147	64.2212	13.4406	This study	SRTM 3-arcseconds, Surface profile	3.79436	3.39994	4.30221	4.84663
33.6988	-80.6553	289.552	69.73	1.1	-3	-7	-5	4	74.73	2.28254	5.66005	12.2819	69.0699	12.4922	Rovere et al. 2015	Field measurement, differential GNSS	3.98136	3.56425	4.49354	5.04314
33.9291	-80.497	319.702	67.89	2.55	-3	-7	-5	4	72.89	3.24076	5.21313	12.1981	67.6769	12.6213	Rovere et al., 2014 as modified by Rovere et al., 2015	1/3 arc-second elevation data from the National Elevation Dataset	8.90018	8.37122	9.42563	9.96543
33.9995	-80.449	328.484	71	5	-3	-7	-5	4	76	5.38516	5.07075	12.1655	70.9293	13.3041	This study	SRTM 3-arcseconds, Surface profile	9.61697	9.13671	10.1304	10.6749
34.0578	-80.4103	335.704	71.06	2.55	-3	-7	-5	4	76.06	3.24076	4.933	12.1741	71.127	12.598	Rovere et al., 2014 as modified by Rovere et al., 2015	1/3 arc-second elevation data from the National Elevation Dataset	10.2286	9.82657	10.7173	11.2488
34.0791	-80.3839	339.196	67	5	-3	-7	-5	4	72	5.38516	4.89304	12.1817	67.107	13.3189	This study	SRTM 3-arcseconds, Surface profile	10.6145	10.2735	11.0785	11.5936
34.0912	-80.3751	340.735	68.16	2.55	-3	-7	-5	4	73.16	3.24076	4.86483	12.1834	68.2952	12.6071	Rovere et al. 2015	1/3 arc-second elevation data from the National Elevation Dataset	10.7571	10.4421	11.212	11.7204
34.1437	-80.3368	347.438	69	5	-3	-7	-5	4	74	5.38516	4.74146	12.19	69.2585	13.3265	This study	SRTM 3-arcseconds, Surface profile	11.3941	11.2112	11.8014	12.2718
34.2143	-80.2637	357.919	68	5	-3	-7	-5	4	73	5.38516	4.59108	12.2036	68.4089	13.339	This study	SRTM 3-arcseconds, Surface profile	12.5804	12.689	12.8741	13.248
34.335	-80.1622	374.175	68.16	2.55	-3	-7	-5	4	73.16	3.24076	4.3084	12.2105	68.8516	12.6332	Rovere et al., 2014 as modified by Rovere et al., 2015	1/3 arc-second elevation data from the National Elevation Dataset	14.385	14.8164	14.3837	14.4937
34.3329	-80.1419	376.274	67	5	-3	-7	-5	4	72	5.38516	4.33074	12.217	67.6693	13.3512	This study	SRTM 3-arcseconds, Surface profile	14.6998	15.1479	14.6732	14.7525
34.43	-80.0443	390.472	68	5	-3	-7	-5	4	73	5.38516	4.10889	12.2188	68.8911	13.3529	This study	SRTM 3-arcseconds, Surface profile	16.7638	17.151	16.531	16.3635
34.4715	-80.0095	396.058	73.6	2.55	-3	-7	-5	4	78.6	3.24076	4.00698	12.2156	74.593	12.6382	Rovere et al., 2014 as modified by Rovere et al., 2015	1/3 arc-second elevation data from the National Elevation Dataset	17.6007	17.9596	17.3162	17.0783
34.486	-79.9853	398.961	76	5	-3	-7	-5	4	81	5.38516	3.98399	12.2209	77.016	13.3548	This study	SRTM 3-arcseconds, Surface profile	18.12	18.4685	17.8163	17.5464
34.7333	-79.6963	438.994	73	5	-3	-7	-5	4	78	5.38516	3.48319	12.2643	74.5168	13.3945	This study	SRTM 3-arcseconds, Surface profile	24.478	24.8259	24.1729	23.8291
34.7647	-79.6193	447.565	73.9	2.55	-3	-7	-5	4	78.9	3.24076	3.45285	12.2824	75.4471	12.7027	Rovere et al., 2014 as modified by Rovere et al., 2015	1/3 arc-second elevation data from the National Elevation Dataset	25.5003	25.9377	25.1806	24.8385
34.846	-79.4878	463.798	79.2	2.55	-3	-7	-5	4	84.2	3.24076	3.30765	12.2964	80.8924	12.7163	Rovere et al., 2014 as modified by Rovere et al., 2015	1/3 arc-second elevation data from the National Elevation Dataset	27.2065	27.8884	26.8327	26.4833
34.9062	-79.4048	475.059	77.27	2.55	-3	-7	-5	4	82.27	3.24076	3.18348	12.297	79.0865	12.7169	Rovere et al. 2015	1/3 arc-second elevation data from the National Elevation Dataset	28.1333	28.9836	27.6473	27.2207
34.95	-79.3423	482.932	77.8	2.18	-3	-7	-5	4	82.8	2.95845	3.09275	12.296	79.7073	12.6469	Rovere et al. 2015	Field measurement, differential GNSS	28.8384	29.7687	28.2356	27.6972
34.9481	-79.3202	485.212	77.85	2.18	-3	-7	-5	4	82.85	2.95845	3.11773	12.3044	79.7323	12.655	Rovere et al., 2014 as modified by Rovere et al., 2015	Field measurement, differential GNSS	29.0282	29.9688	28.3904	27.8159
34.9671	-79.2481	492.904	79	5	-3	-7	-5	4	84	5.38516	3.11594	12.3181	80.8841	13.4438	This study	SRTM 3-arcseconds, Surface profile	29.7635	30.7141	29.0185	28.3244
34.9795	-79.2336	494.873	76.96	2.55	-3	-7	-5	4	81.96	3.24076	3.08678	12.3159	78.8732	12.7352	Rovere et al., 2014 as modified by Rovere et al., 2015	1/3 arc-second elevation data from the National Elevation Dataset	29.9537	30.8974	29.1926	28.4772
35.0348	-79.0707	512.606	68	5	-3	-7	-5	4	73	5.38516	3.04115	12.348	69.9588	13.4712	This study	SRTM 3-arcseconds, Surface profile	31.7223	32.6502	30.8265	29.9515
35.0799	-79.0278	519.022	80.06	2.55	-3	-7	-5	4	85.06	3.24076	2.92966	12.3501	82.1303	12.7682	Rovere et al. 2015	1/3 arc-second elevation data from the National Elevation Dataset	32.3329	33.2093	31.4824	30.6411
35.1026	-78.964	526.002	73	5	-3	-7	-5	4	78	5.38516	2.91861	12.3771	75.0814	13.4978	This study	SRTM 3-arcseconds, Surface profile	33.0005	33.8514	32.1707	31.3452
35.1311	-78.9461	529.477	71.46	2.55	-3	-7	-5	4	76.46	3.24076	2.84523	12.3817	73.6148	12.7987	Rovere et al. 2015	1/3 arc-second elevation data from the National Elevation Dataset	33.3094	34.1276	32.5099	31.7104
35.364	-78.5686	576.86	69	5	-3	-7	-5	4	74	5.38516	2.47965	12.556	71.5204	13.6621	This study	SRTM 3-arcseconds, Surface profile	36.0723	36.7302	35.4283	34.8036
35.378	-78.5485	579.388	71.37	2.55	-3	-7	-5	4	76.37	3.24076	2.45366	12.5638	73.9163	12.975	Rovere et al. 2015	1/3 arc-second elevation data from the National Elevation Dataset	36.1135	36.7748	35.466	34.8391
35.4367	-78.484	588.381	56	5	-3	-7	-5	4	61	5.38516	2.32237	12.583	58.6776	13.6869	This study	SRTM 3-arcseconds, Surface profile	36.2971	36.969	35.6367	34.9994
35.5781	-78.364	607.495	57.02	1.5	-3	-7	-5	4	62.02	2.5	1.96341	12.6025	60.0566	12.848	Rovere et al. 2015	Field measurement, differential GNSS	36.7738	37.4488	36.0865	35.4168
35.736	-78.0923	640.061	64	5	-3	-7	-5	4	69	5.38516	1.68519	12.6925	67.3148	13.7876	This study	SRTM 3-arcseconds, Surface profile	37.2581	37.7881	36.6408	36.0257
35.8503	-78.0376	653.124	53.29	2.55	-3	-7	-5	4	58.29	3.24076	1.33803	12.6717	56.952	13.0796	Rovere et al. 2015	1/3 arc-second elevation data from the National Elevation Dataset	37.5357	37.9907	37.0296	36.5214
35.8791	-77.9936	658.543	54	5	-3	-7	-5	4	59	5.38516	1.28085	12.685	57.7192	13.7807	This study	SRTM 3-arcseconds, Surface profile	37.5086	37.9351	37.043	36.563
36.3145	-77.7583	710.489	67	5	-3	-7	-5	4	72	5.38516	0.161094	12.6597	71.8389	13.7574	This study	SRTM 3-arcseconds, Surface profile	37.8904	37.7598	37.8333	37.6641
36.3609	-77.7372	715.746	59.12	1.63	-3	-7	-5	4	64.12	2.5801	0.0392629	12.649	64.0807	12.9094	Rovere et al. 2015	Field measurement, differential GNSS	37.8956	37.6861	37.8989	37.7795
36.3839	-77.7235	718.502	57.28	1.61	-3	-7	-5	4	62.28	2.56751	-0.0171133	12.6465	62.2971	12.9045	Rovere et al. 2015	Field measurement, differential GNSS	37.7895	37.5527	37.8311	37.7497
37.0054	-77.5689	792.304	59.46	2.55	-3	-7	-5	4	64.46	3.24076	-1.83291	12.3611	66.2929	12.7788	Rovere et al. 2015	1/3 arc-second elevation data from the National Elevation Dataset	36.0879	35.6792	36.4847	36.8935
37.2597	-77.5283	819.23	71	5	-3	-7	-5	4	76	5.38516	-2.63776	12.2475	78.6378	13.3792	This study	SRTM 3-arcseconds, Surface profile	36.1401	35.6033	36.6506	37.1024
37.4073	-77.5497	834.605	64.47	1.3	-3	-7	-5	4	69.47	2.38537	-3.15385	12.1494	72.6239	12.3813	Rovere et al. 2015	Field measurement, differential GNSS	36.2213	35.6305	36.788	37.2734
37.4467	-77.5536	838.691	57	5	-3	-7	-5	4	62	5.38516	-3.28971	12.1246	65.2897	13.2667	This study	SRTM 3-arcseconds, Surface profile	36.1799	35.5554	36.775	37.2925
37.4748	-77.529	842.542	64.33	2.55	-3	-7	-5	4	69.33	3.24076	-3.35763	12.125	72.6876	12.5506	Rovere et al. 2015	1/3 arc-second elevation data from the National Elevation Dataset	36.1538	35.4621	36.8004	37.3391
37.5039	-77.5109	846.08	62.81	1.5	-3	-7	-5	4	67.81	2.5	-3.43618	12.1202	71.2462	12.3754	Rovere et al. 2015	Field measurement, differential GNSS	36.1254	35.3731	36.819	37.386
37.6189	-77.5121	858.105	65.11	2.55	-3	-7	-5	4	70.11	3.24076	-3.82214	12.0537	73.9321	12.4818	Rovere et al. 2015	1/3 arc-second elevation data from the National Elevation Dataset	36.005	35.1293	36.7995	37.4793
37.6295	-77.5035	859.509	65	5	-3	-7	-5	4	70	5.38516	-3.84877	12.053	73.8488	13.2013	This study	SRTM 3-arcseconds, Surface profile	35.9946	35.0908	36.8106	37.5071
37.711	-77.5034	867.908	66.4	2.3	-3	-7	-5	4	71.4	3.04795	-4.12123	12.0064	75.5212	12.3873	Rovere et al. 2015	Field measurement, differential GNSS	35.9092	34.9148	36.7991	37.5792
37.7844	-77.5151	875.574	68	5	-3	-7	-5	4	73	5.38516	-4.37881	11.9574	77.3788	13.1141	This study	SRTM 3-arcseconds, Surface profile	35.7597	34.7139	36.6964	37.5339
38.0157	-77.5462	899.946	75.9	2	-3	-7	-5	4	80.9	2.82843	-5.1943	11.8145	86.0943	12.1484	Rovere et al. 2015	Field measurement, differential GNSS	34.9881	33.7417	36.0898	37.1037
38.0424	-77.5356	902.906	85	5	-3	-7	-5	4	90	5.38516	-5.29252	11.8151	95.2925	12.9845	This study	SRTM 3-arcseconds, Surface profile	34.8768	33.5937	36.0154	37.0697
38.0724	-77.533	906.016	74.48	2.55	-3	-7	-5	4	79.48	3.24076	-5.41216	11.8107	84.8922	12.2472	Rovere et al. 2015	1/3 arc-second elevation data from the National Elevation Dataset	34.7675	33.4507	35.9363	37.023
38.1341	-77.5263	912.414	74.54	1.8	-3	-7	-5	4	79.54	2.69072	-5.65659	11.802	85.1966	12.1049	Rovere et al. 2015	Field measurement, differential GNSS	34.4868	33.1297	35.7076	36.8543
38.2275	-77.5334	922.073	80	5	-3	-7	-5	4	85	5.38516	-6.04341	11.7803	91.0434	12.9529	This study	SRTM 3-arcseconds, Surface profile	34.0043	32.6429	35.2671	36.4667
38.4179	-77.4687	942.846	87	5	-3	-7	-5	4	92	5.38516	-6.75549	11.7708	98.7555	12.9442	This study	SRTM 3-arcseconds, Surface profile	32.8437	31.4657	34.2176	35.5679
38.9077	-77.1	1006.49	71	5	-3	-7	-5	4	76	5.38516	-8.40768	11.7706	84.4077	12.944	This study	SRTM 3-arcseconds, Surface profile	31.0244	29.5263	32.4961	33.9263
39.1733	-76.7688	1050.35	59	5	-3	-7	-5	4	64	5.38516	-9.26259	11.8876	73.2626	13.0505	This study	SRTM 3-arcseconds, Surface profile	31.3415	29.5724	33.0577	34.7511
39.4007	-76.4687	1089.26	54	5	-3	-7	-5	4	59	5.38516	-10.0185	12.0007	69.0185	13.1536	This study	SRTM 3-arcseconds, Surface profile	30.9992	29.1528	32.8556	34.7188

[truncated: 1 more sheets: README]
