# Supplementary figures and images for: Pliocene shorelines and the epeirogenic motion of continental margins: A target dataset for dynamic topography models
Source: Copernicus journal article supplement (doi:10.5194/egusphere-2023-2099), 2024-02-23

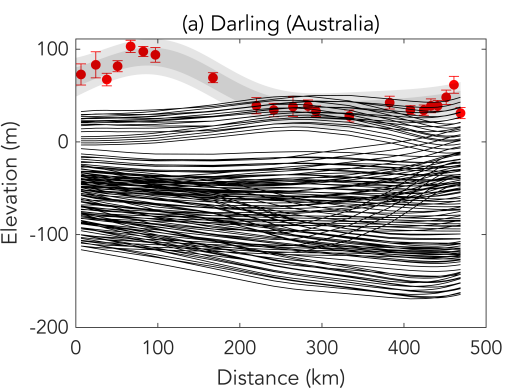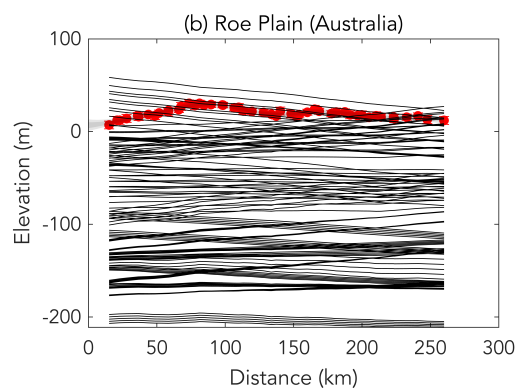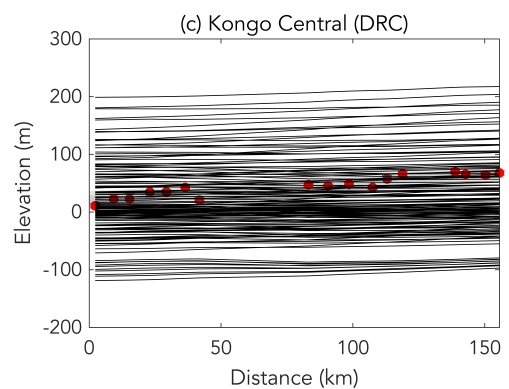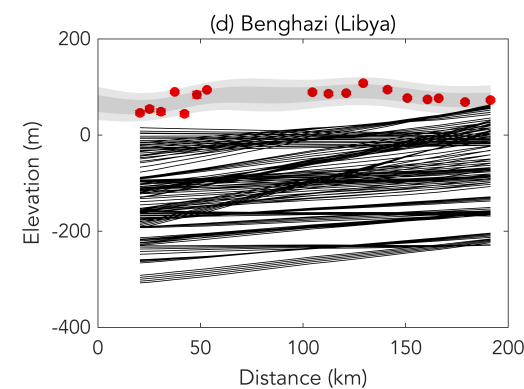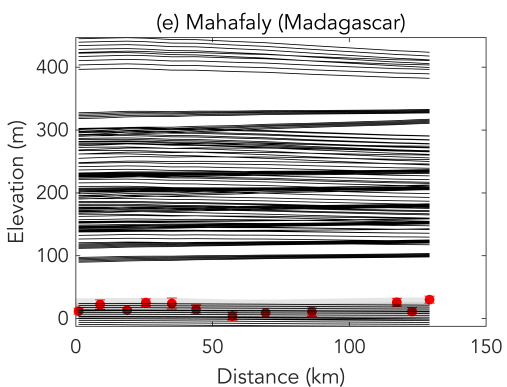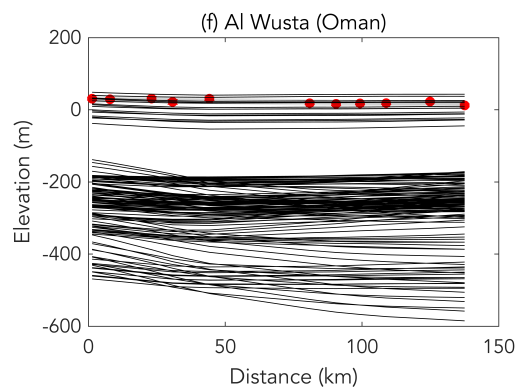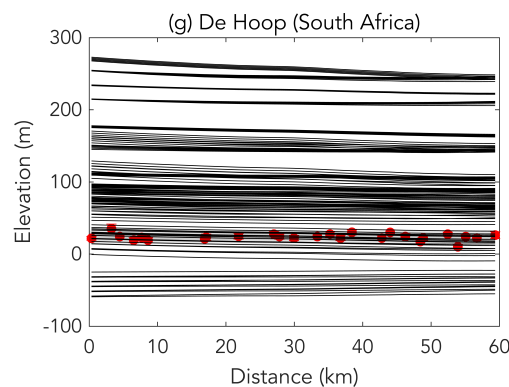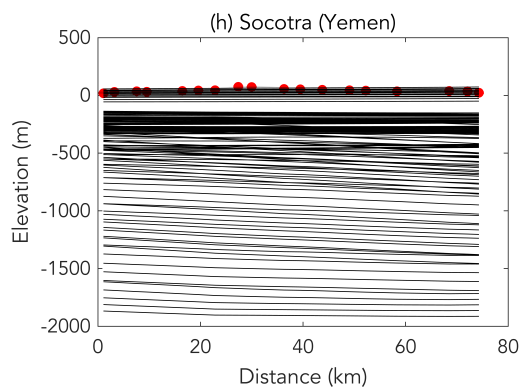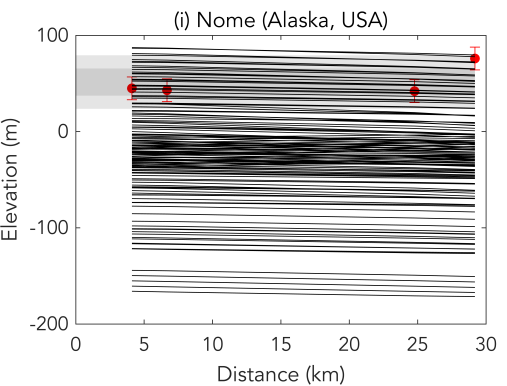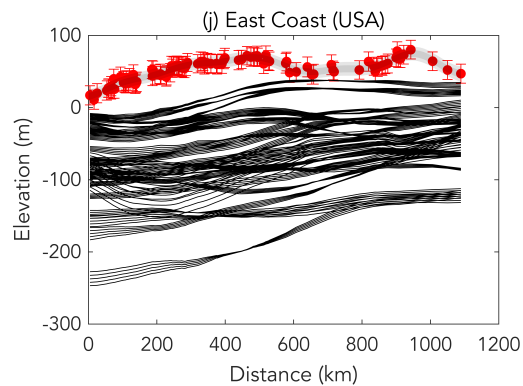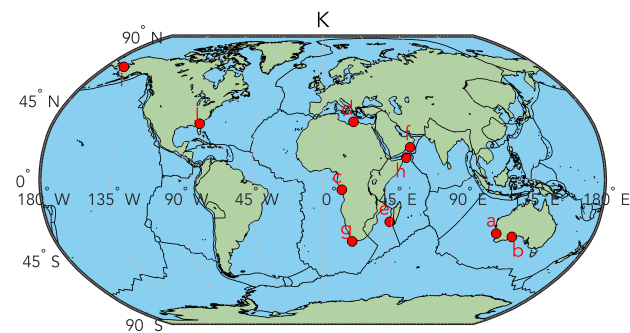

Supplement: Supplementary file 2 [file egusphere-2023-2099-supplement.zip]
